# Supplementary material for: Coordinated volatile isoprenoid production and leaf turnover protect central Amazon Forest trees against stress
Source: Research Square preprint supplement (doi:10.21203/rs.3.rs-7270146/v1), 2025-09-03
Supplement: Supplementary file 1 [file 7a6b0910535fa4c43c987e1a.docx]

# Supplementary material for

**Coordinated volatile isoprenoid production and leaf turnover protect central Amazon Forest trees against stress**

Michelle Robin1, Vinícius F. de Souza2, Joseph Byron3, Ülo Niinemets2, Jonathan Williams3, Christine Römermann4,5,6, Flávio A. F. D’Oliveira7, Cléo Quaresma Dias-Junior7,9, José Francisco C. Gonçalves8, Eliane Gomes Alves1,9*

1Biogeochemical Processes Department, Max Planck Institute for Biogeochemistry, Jena, Germany

2Institute of Agricultural and Environmental Sciences, Estonian University of Life Sciences, Tartu, Estonia

3Atmospheric Chemistry Department, Max Planck Institute for Chemistry, Mainz, Germany

4Institute for Biodiversity, Ecology and Evolution, Friedrich-Schiller University, Jena, Germany

5Senckenberg Institute for Plant Form and Function Jena (SIP), Jena, Germany

6German Centre for Integrative Biodiversity Research (iDiv) Halle-Jena-Leipzig, Germany

7Department of Physics, Federal Institute of Pará (IFPA), Belém, Brazil

8Coordination of Environmental Dynamics, National Institute of Amazonian Research, Manaus, Brazil

9Department of Climate and Environment, National Institute of Amazonian Research, Manaus, Brazil

*corresponding authors: Michelle Robin - mcarneiro@bgc-jena.mpg.de; Eliane Gomes Alves - egomes@bgc-jena.mpg.de

# Supplementary figures


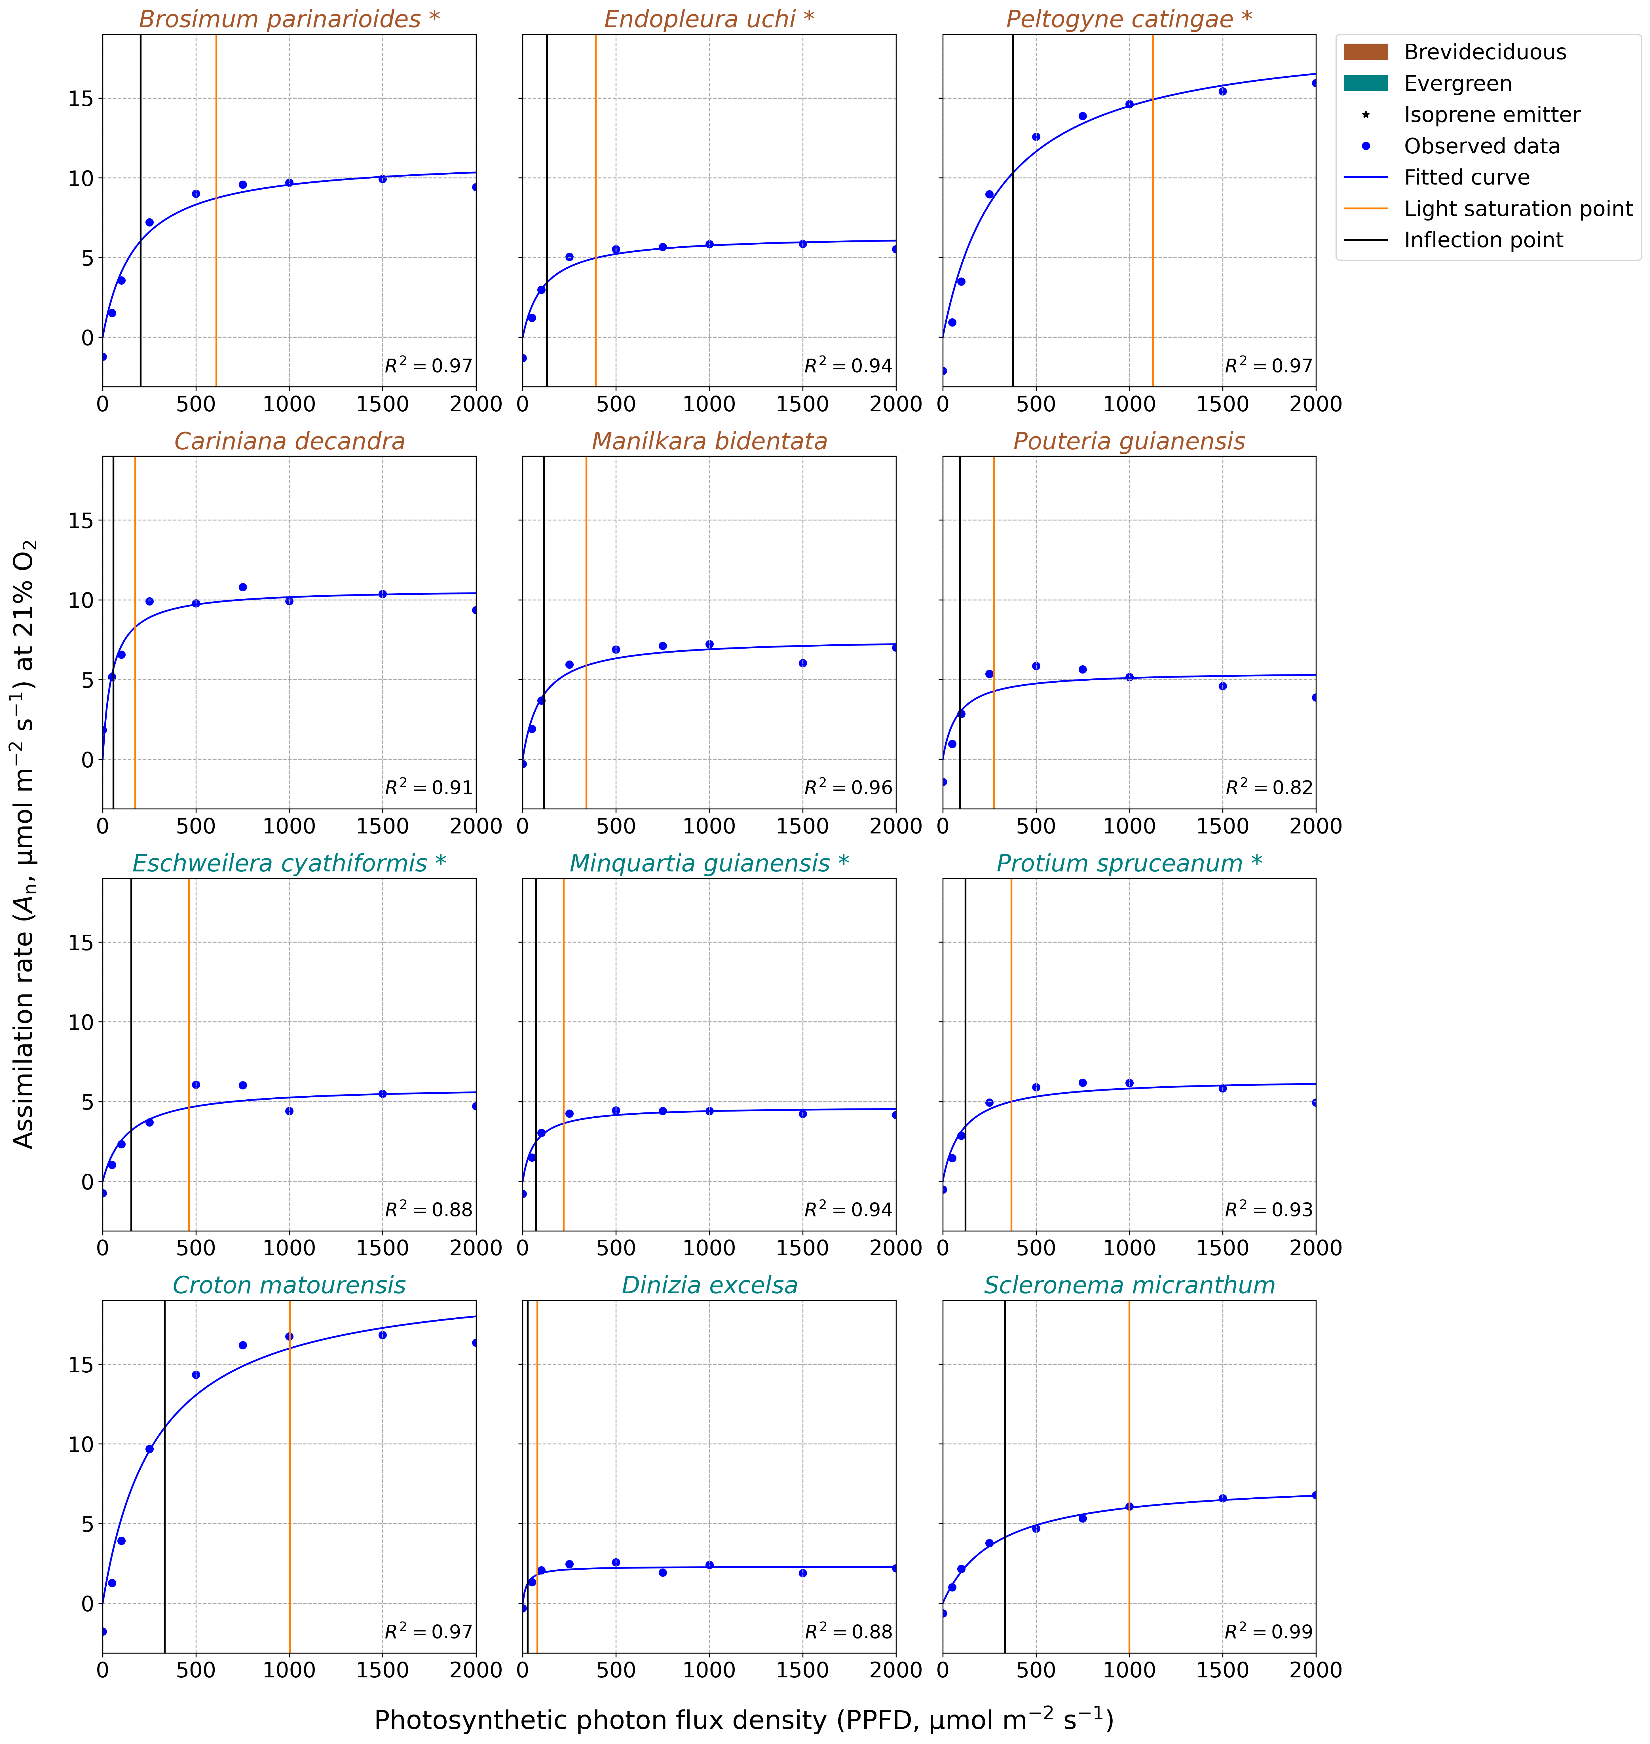


**Figure S1.** Observed data points and fitted hyperbolic curves (in blue) of net assimilation rate (*A*n, µmol m-2 s-1) responses to increases in light intensity (photosynthetic photon flux density, PPFD, µmol m-2 s-1) under ambient oxygen (21% O2) concentrations for each species measured in this study. The font color for the species names corresponds to their leaf phenological types (Brevideciduous - brown; Evergreen - green), the symbol “*” indicates that the species was classified as isoprene emitter in Robin et al. (2024), vertical yellow and black lines indicate the estimated light saturation point (*LSP*) and the inflection point, respectively.


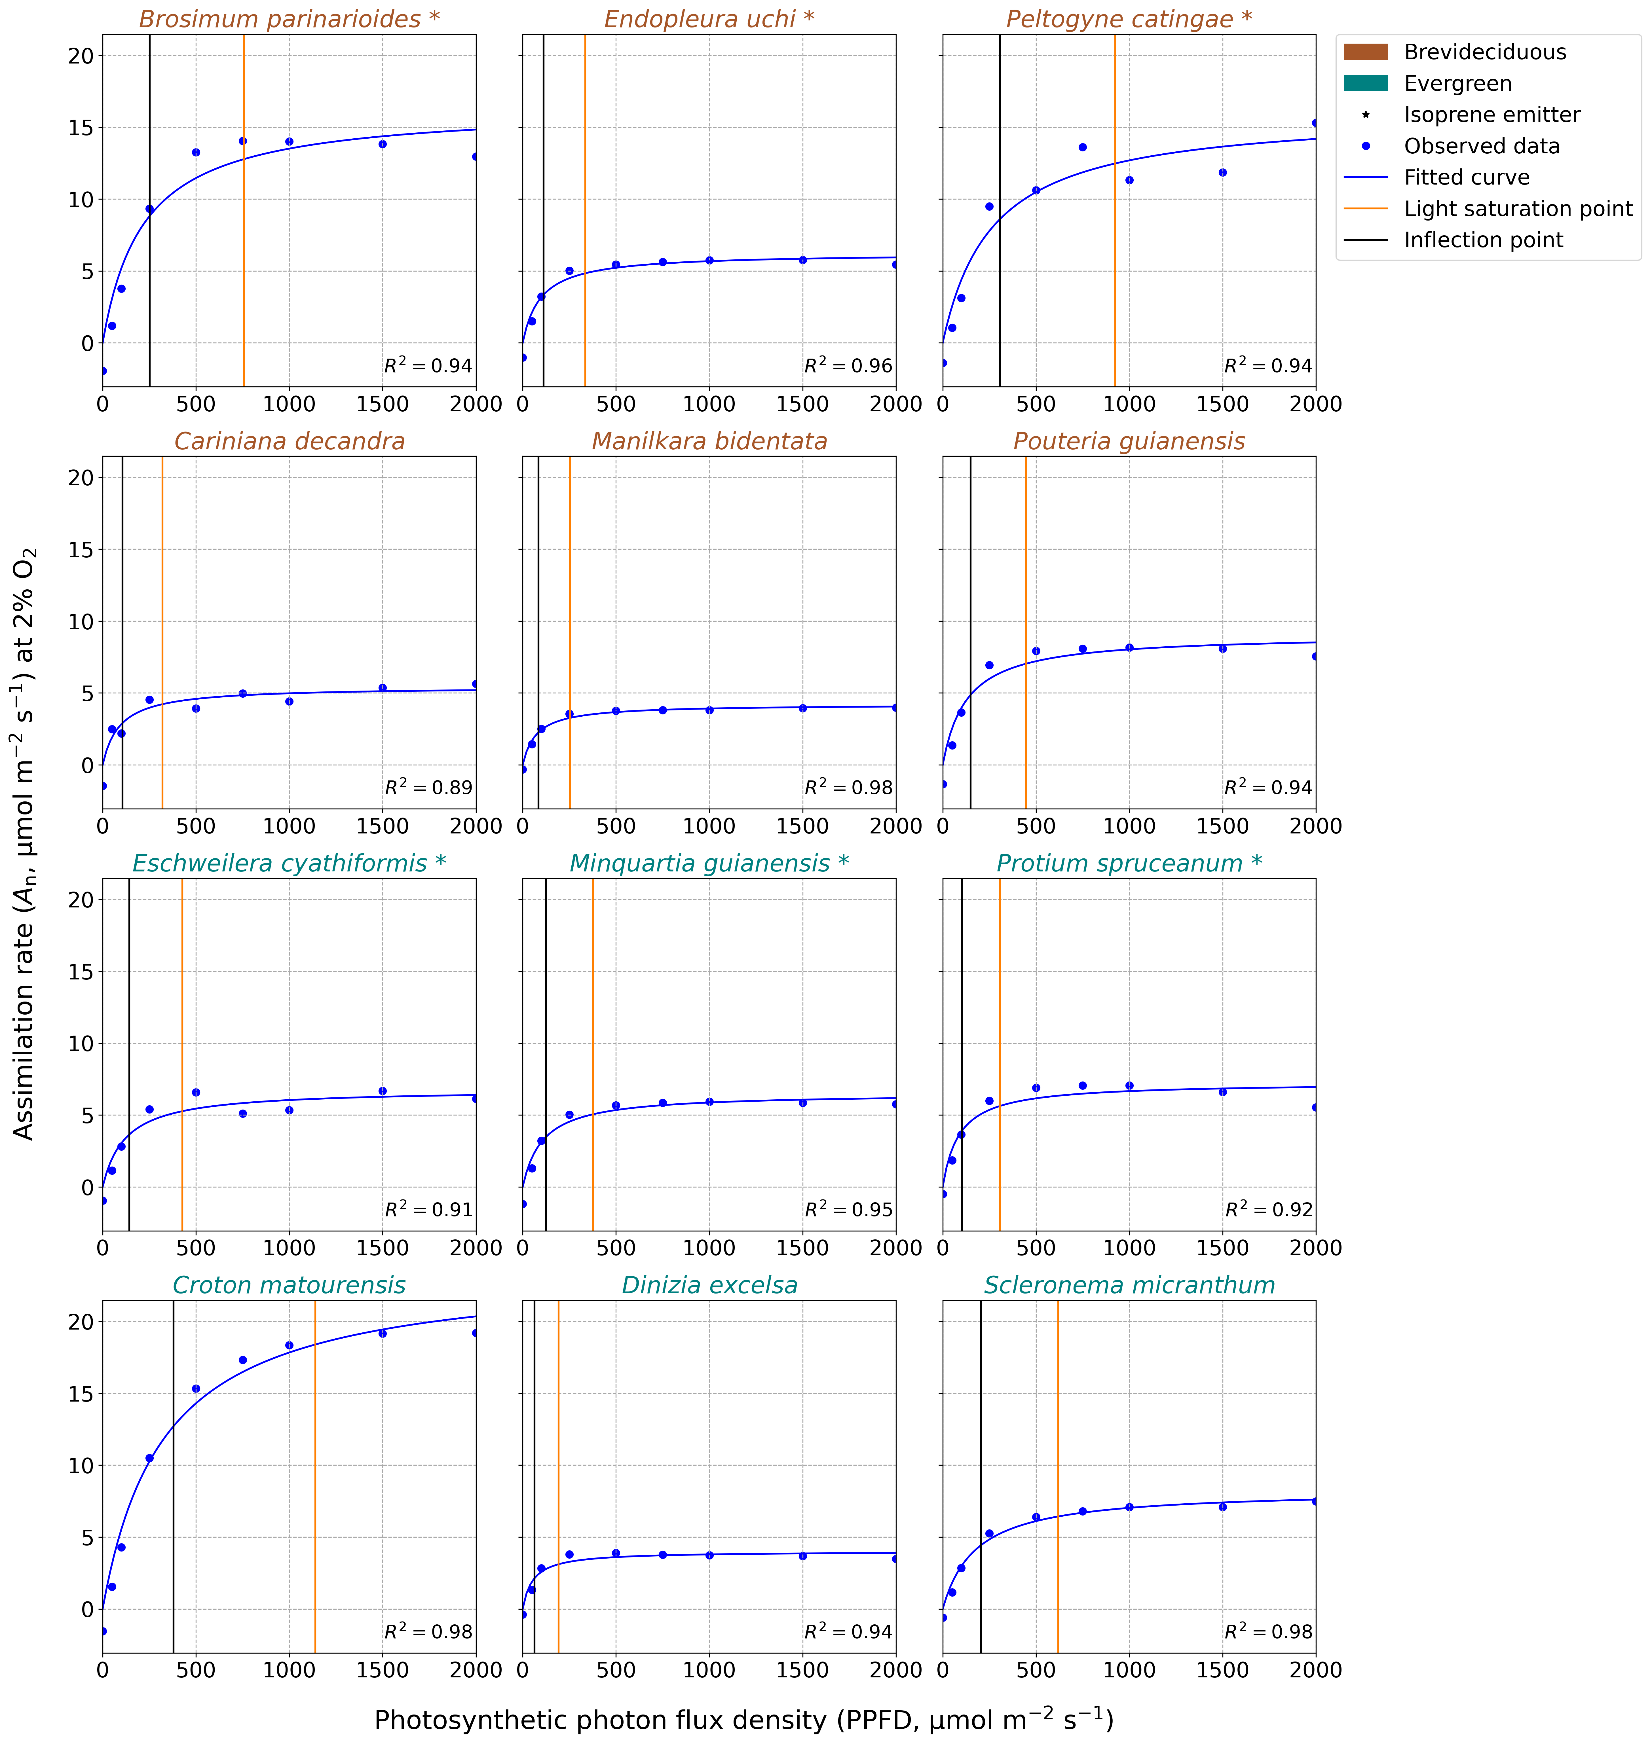


**Figure S2.** Observed data points and fitted hyperbolic curves (in blue) of net assimilation rate (*A*n, µmol m-2 s-1) responses to increases in light intensity (photosynthetic photon flux density, PPFD, µmol m-2 s-1) under reduced oxygen (2% O2) concentrations for each species measured in this study. The font color for the species names corresponds to their leaf phenological types (Brevideciduous - brown; Evergreen - green), the symbol “*” indicates that the species was classified as an isoprene emitter in Robin et al. (2024), vertical yellow and black lines indicate the estimated light saturation point (*LSP*) and the inflection point, respectively.


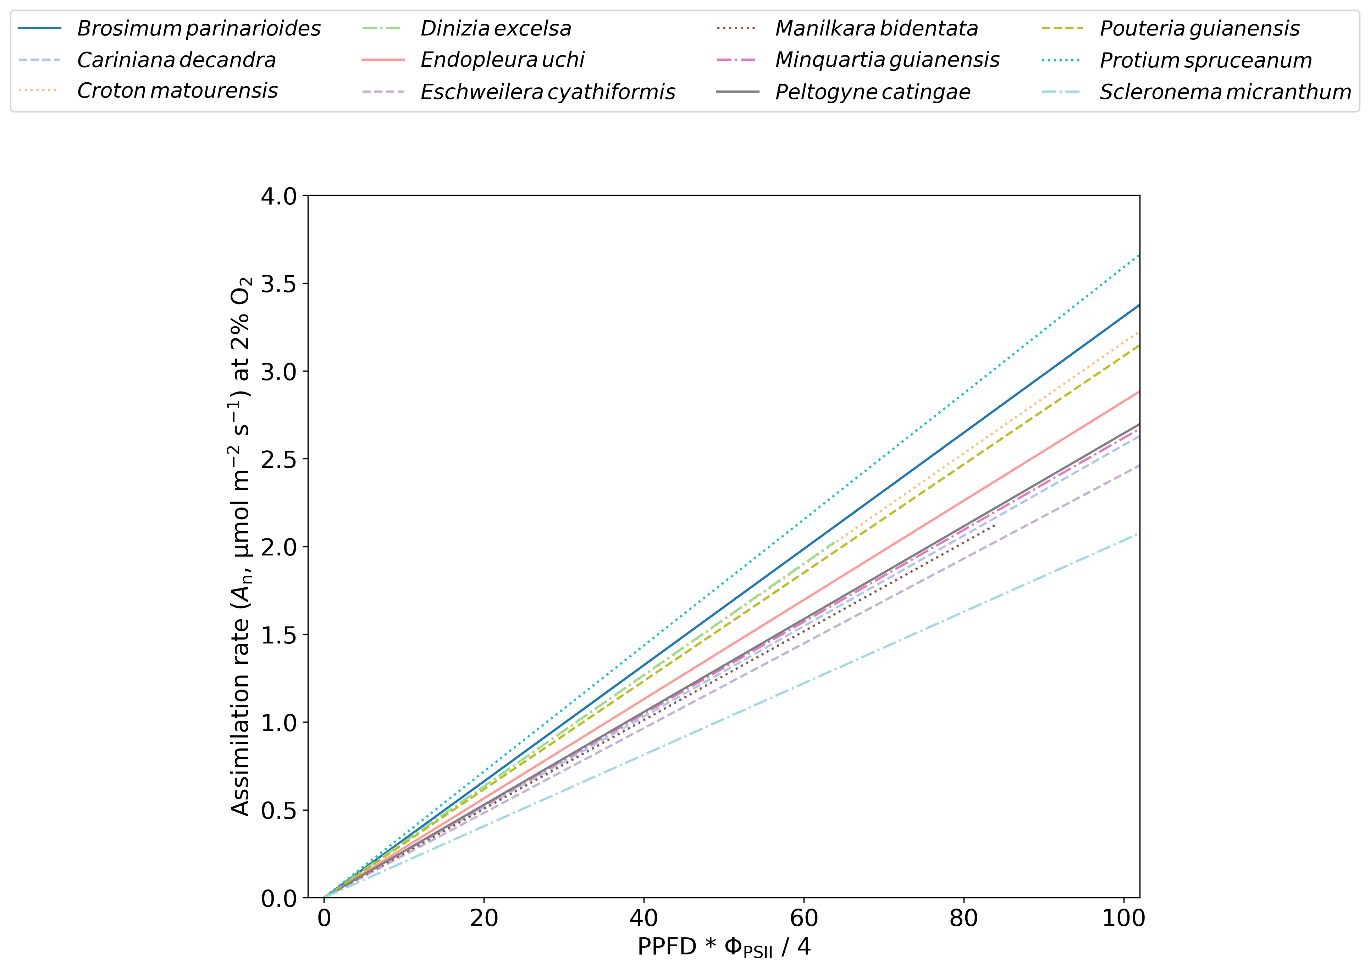


**Figure S3.** Linear regression between net assimilation rates (*A*n, µmol m-2 s-1) observed before the light inflection point (Fig. S2) and PPFD ϕPSII / 4 at reduced (2%) oxygen (O2) concentrations, for each species measured in this study.


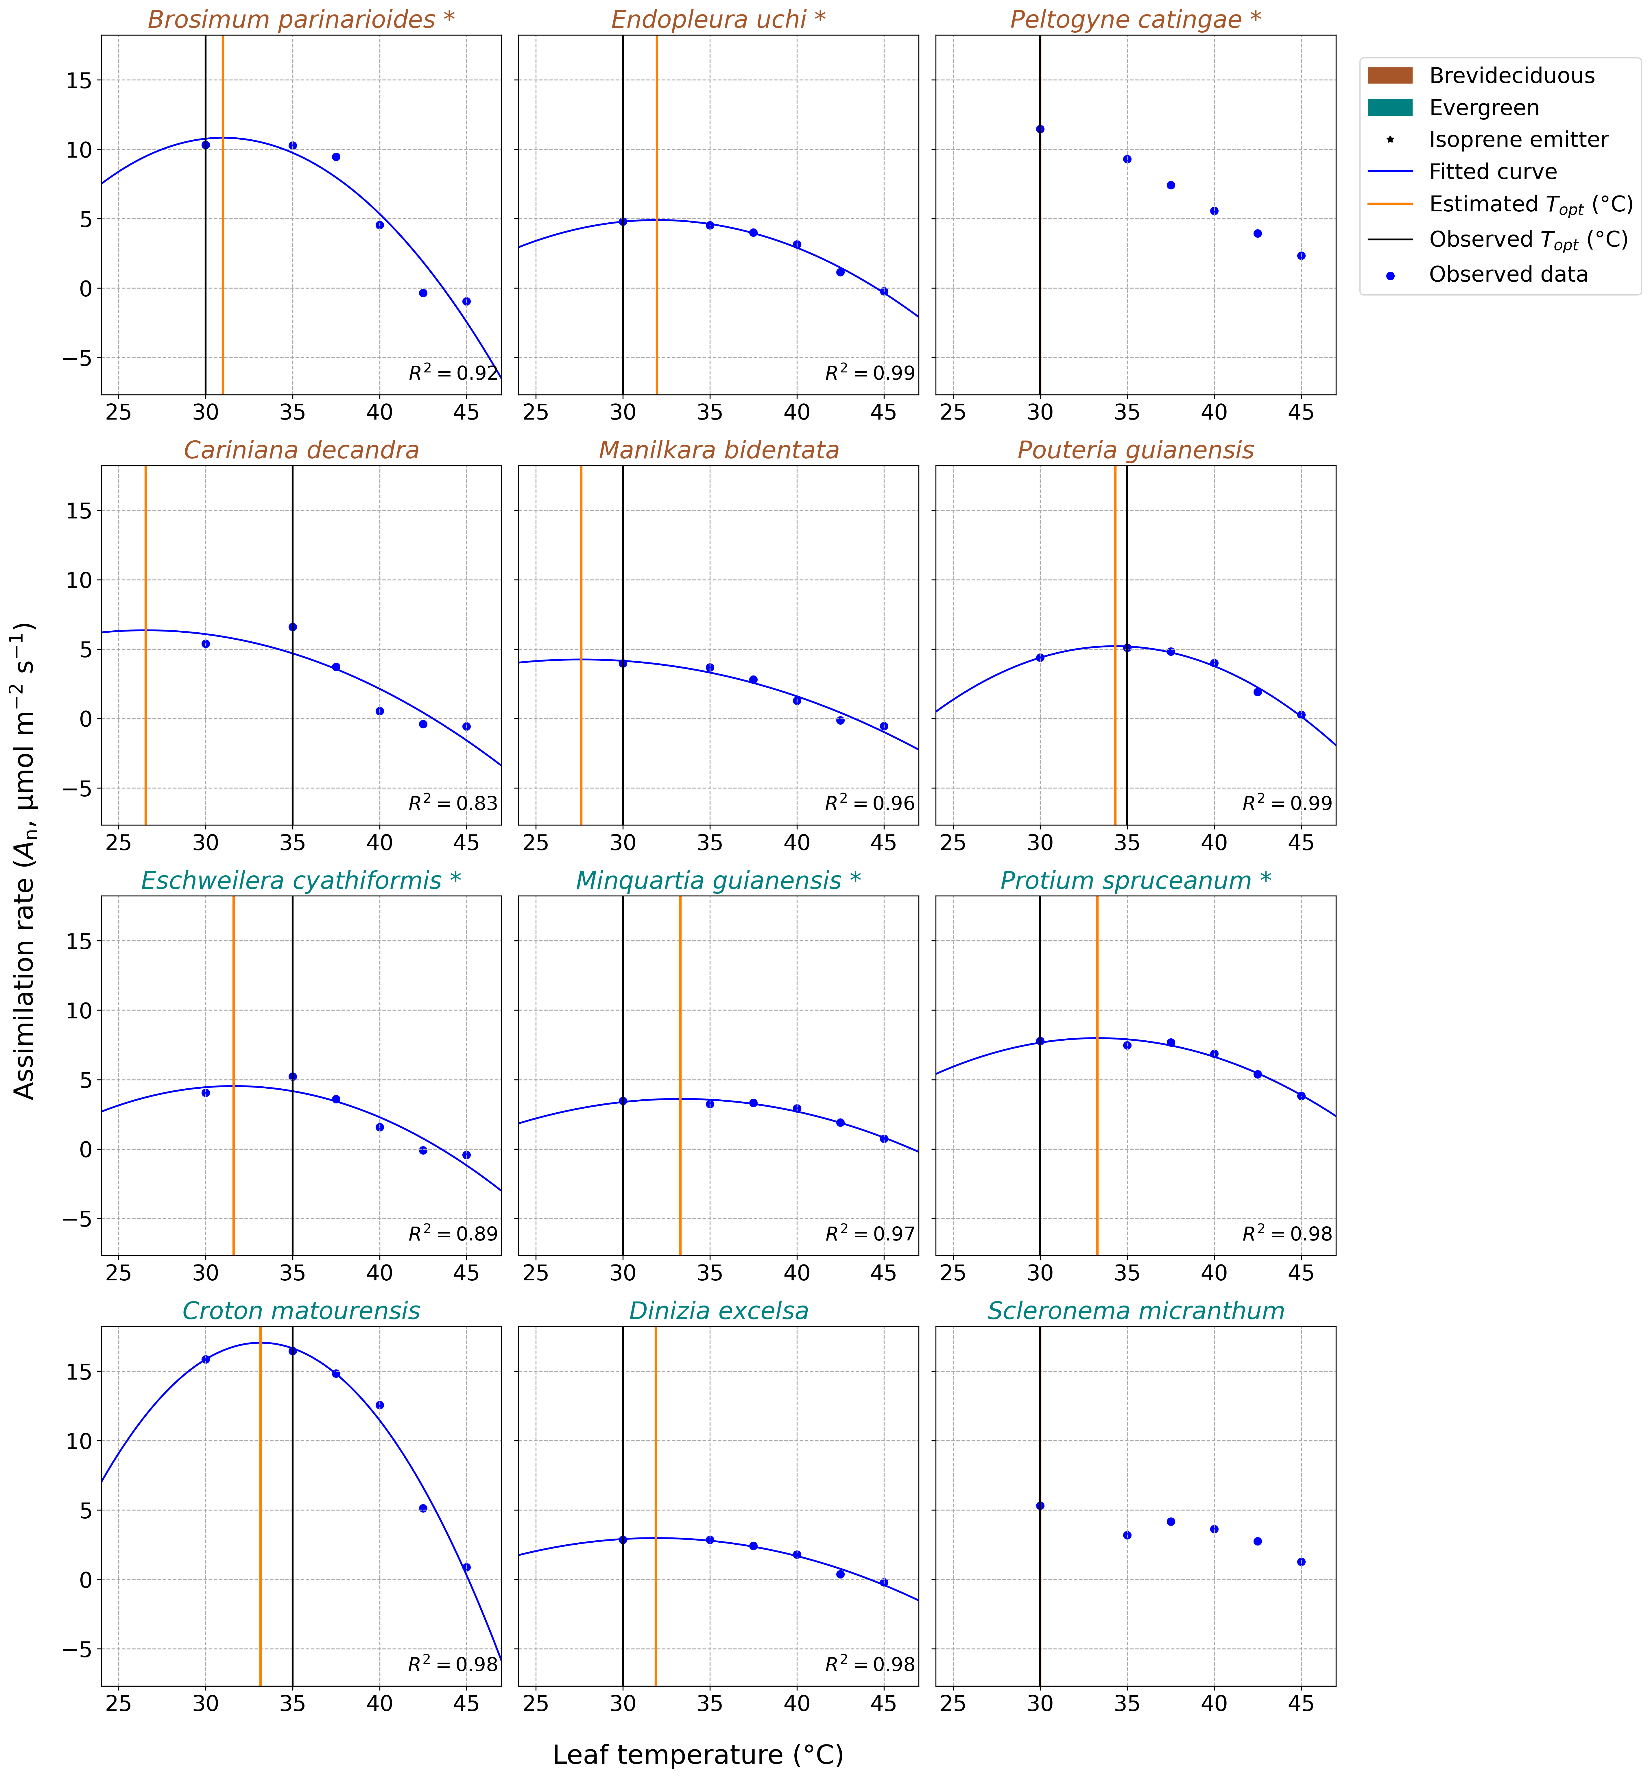


**Figure S4.** Observed data points and fitted quadratic curves (in blue) of net assimilation rate (*A*n, µmol m-2 s-1) responses to increases in leaf temperature (°C) for each species measured in this study. The font color for the species names corresponds to their leaf phenological types (Brevideciduous - brown; Evergreen - green), the symbol “*” indicates that the species was classified as an isoprene emitter in Robin et al. (2024), vertical yellow and black lines indicate, respectively, modeled estimated and observed photosynthesis temperature optimum (*T*opt).


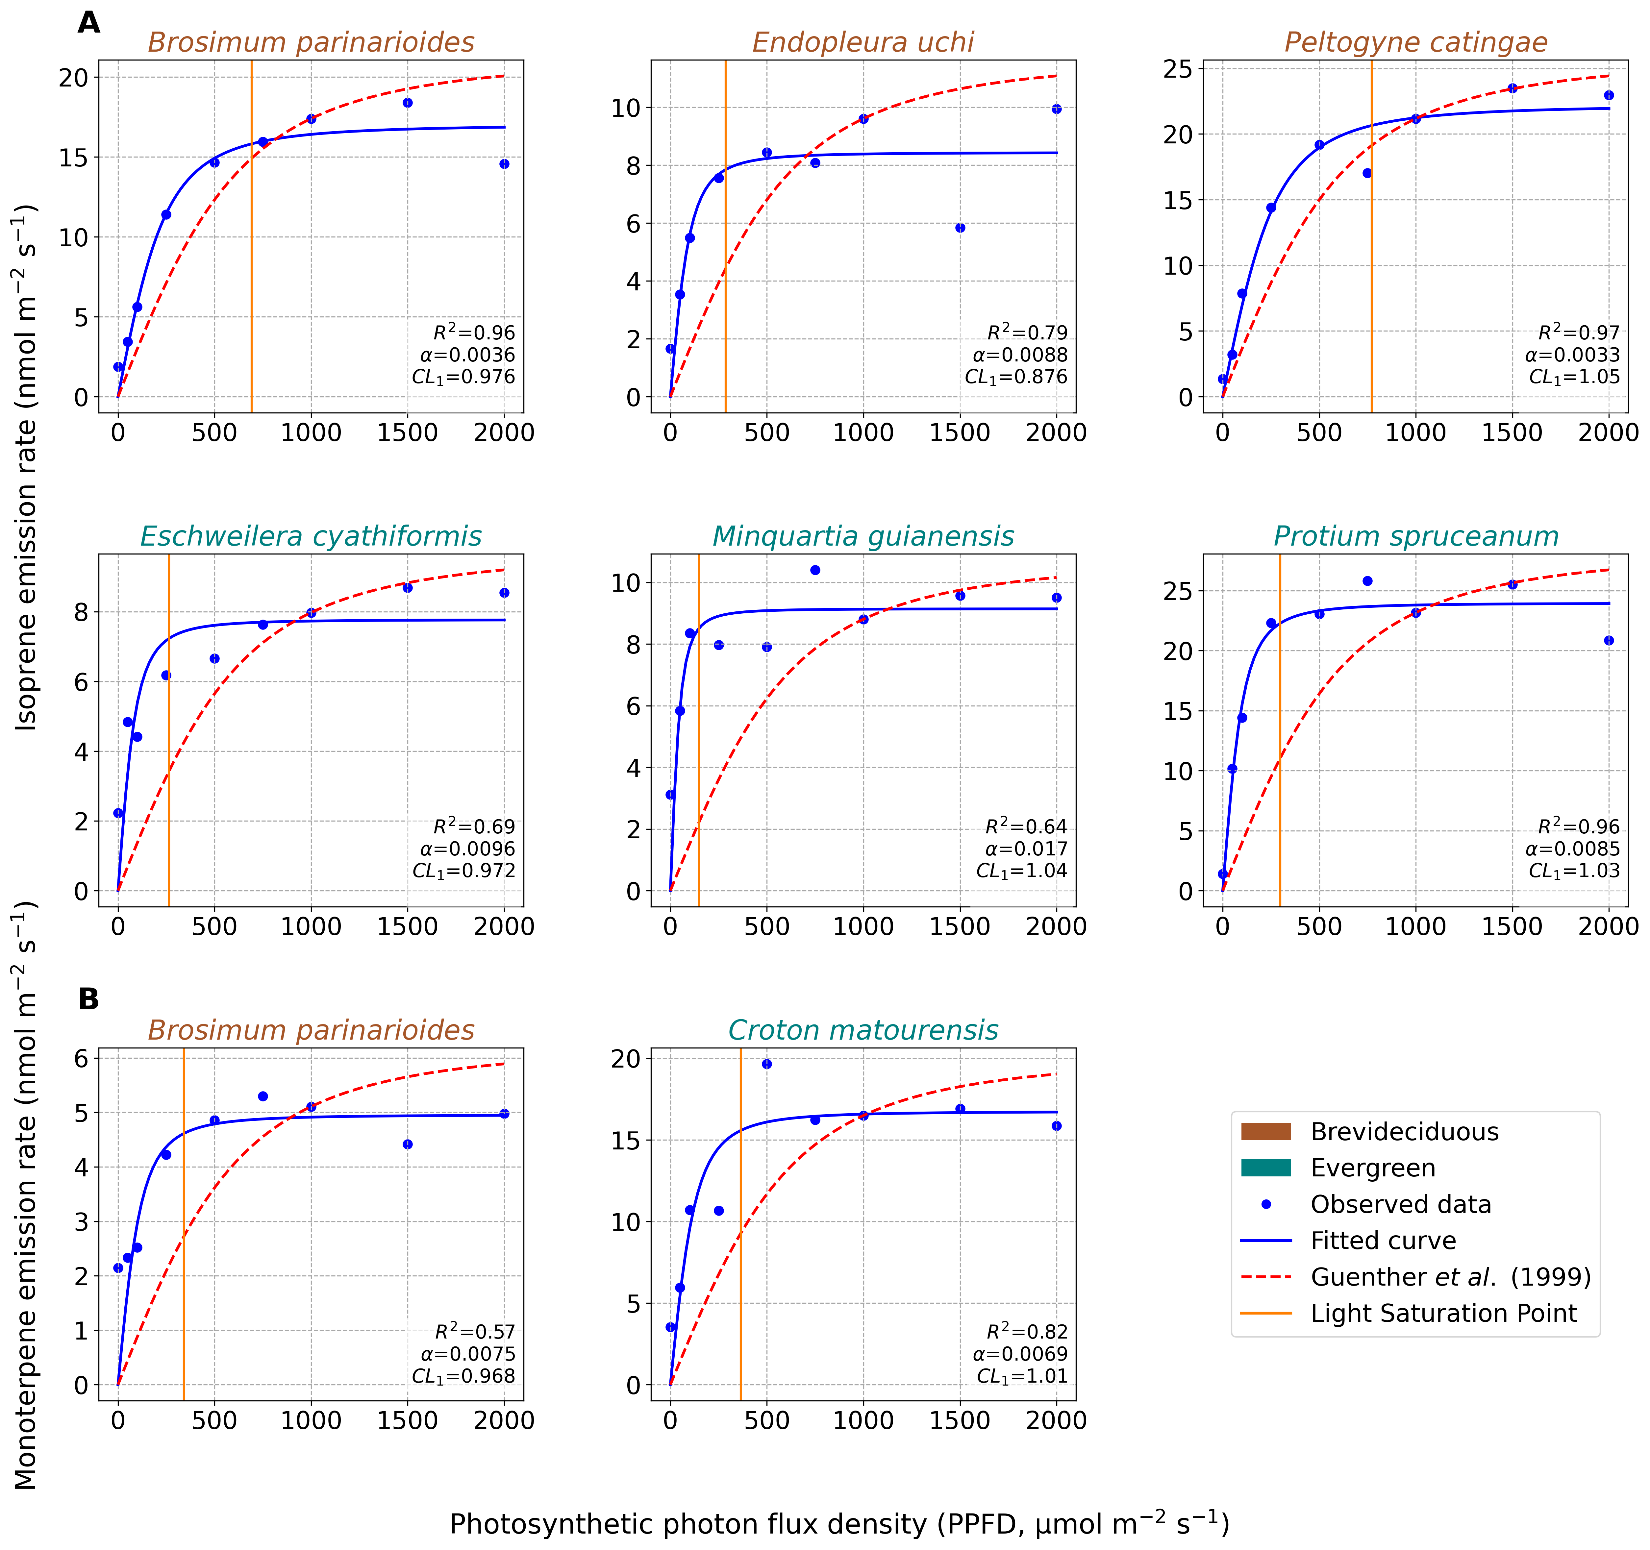


**Figure S5.** Observed and fitted (A) isoprene and (B) monoterpene emission (nmol m-2 s-1) responses to increases in light intensity (photosynthetic photon flux density, PPFD, µmol m-2 s-1) for each isoprene-emitting and light-dependent monoterpene-emitting species observed in this study. The font color of the species names corresponds to their leaf phenological types (Brevideciduous - brown; Evergreen - green), in red is the response curve fitted using α and *C*L1 parameters suggested in Guenther et al. (1999), in blue are the observed data points and the response curve with parameters estimated based on non-linear least-square fits to the observed data, and vertical yellow lines indicate the estimated isoprene light saturation point (*LSP*).


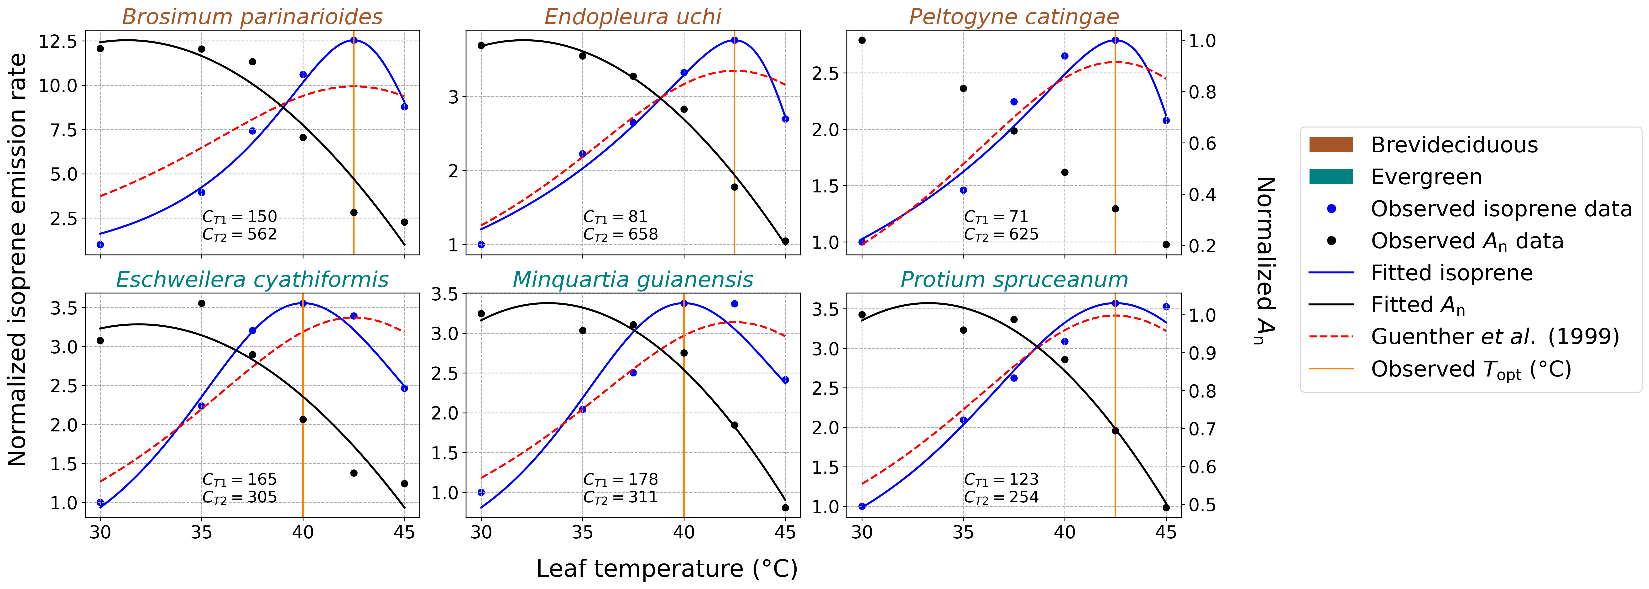


**Figure S6.** Observed and fitted normalized isoprene emission (nmol m-2 s-1) and net assimilation rate (*A*n, µmol CO2 m-2 s-1) responses to increases in leaf temperature (°C) for each isoprene-emitting species observed in this study. Isoprene emission and net assimilation rates for each species were normalized by their respective observed isoprene emission and net assimilation rates at 30 °C. The font color of the species names corresponds to their leaf phenological types (Brevideciduous - brown; Evergreen - green), in red is the response curve fitted using *C*T1 and *C*T2 parameters suggested by Guenther et al. (1999), in blue are the observed normalized isoprene emission data points and response curve with parameters estimated based on non-linear least-square fits to the observed data, in black are the observed normalized *A*n data points and fitted quadratic response curve, and vertical yellow lines indicate the estimated isoprene temperature optimum (*T*opt).


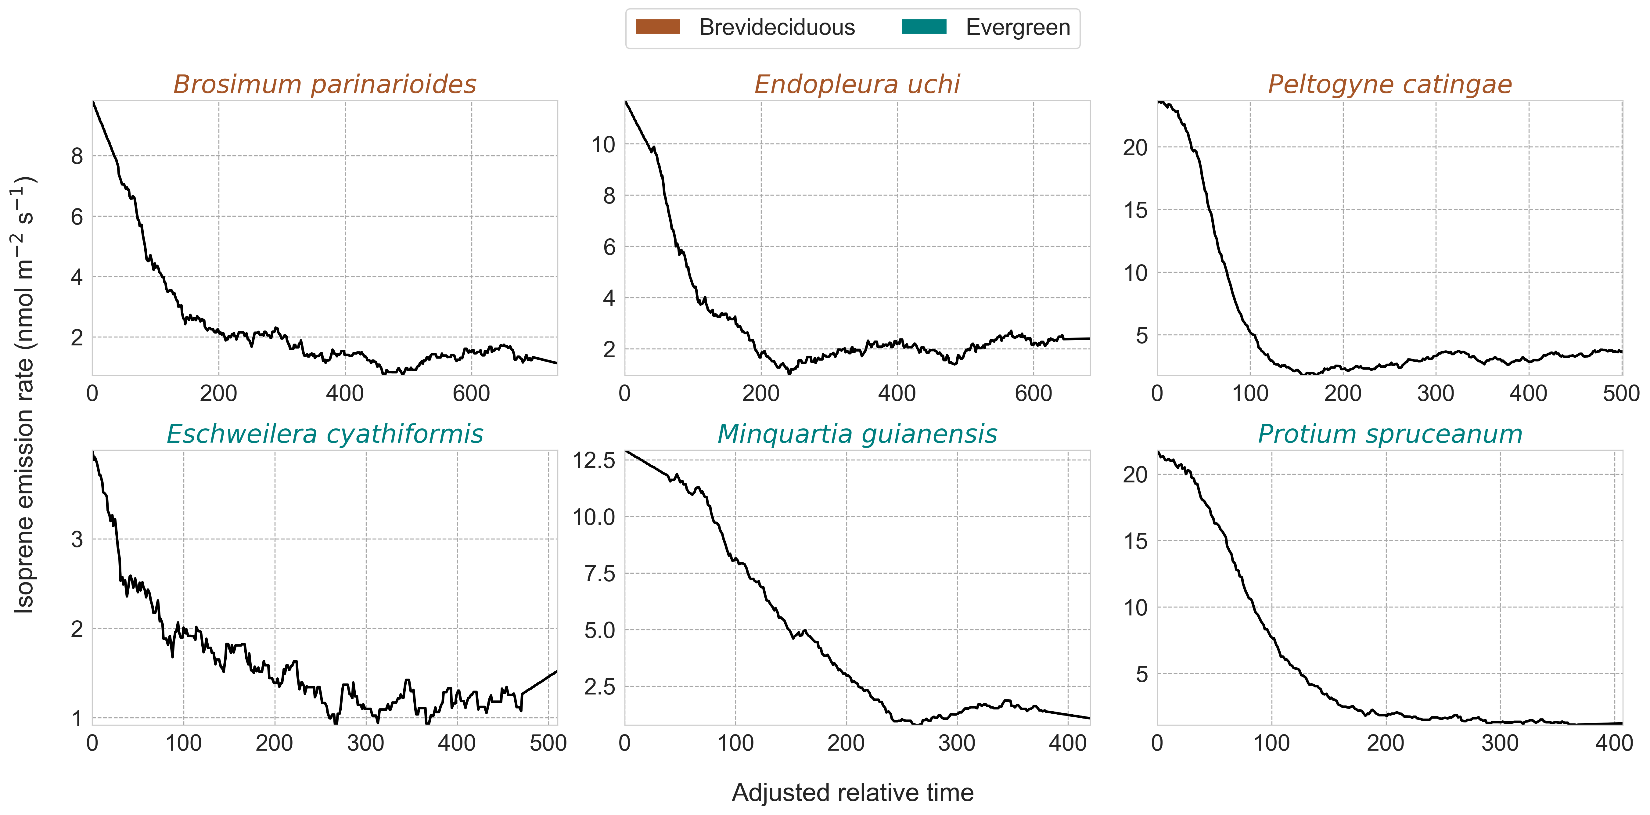


**Figure S7.** First dark-decay kinetics of isoprene emissions for each isoprene-emitting species evaluated in this study. Isoprene emission rates (nmol m-2 s-1) were normalized by subtracting the chamber-clearing trace from the observed emission values. The font color of the species names corresponds to their leaf phenological types (Brevideciduous - brown; Evergreen - green).


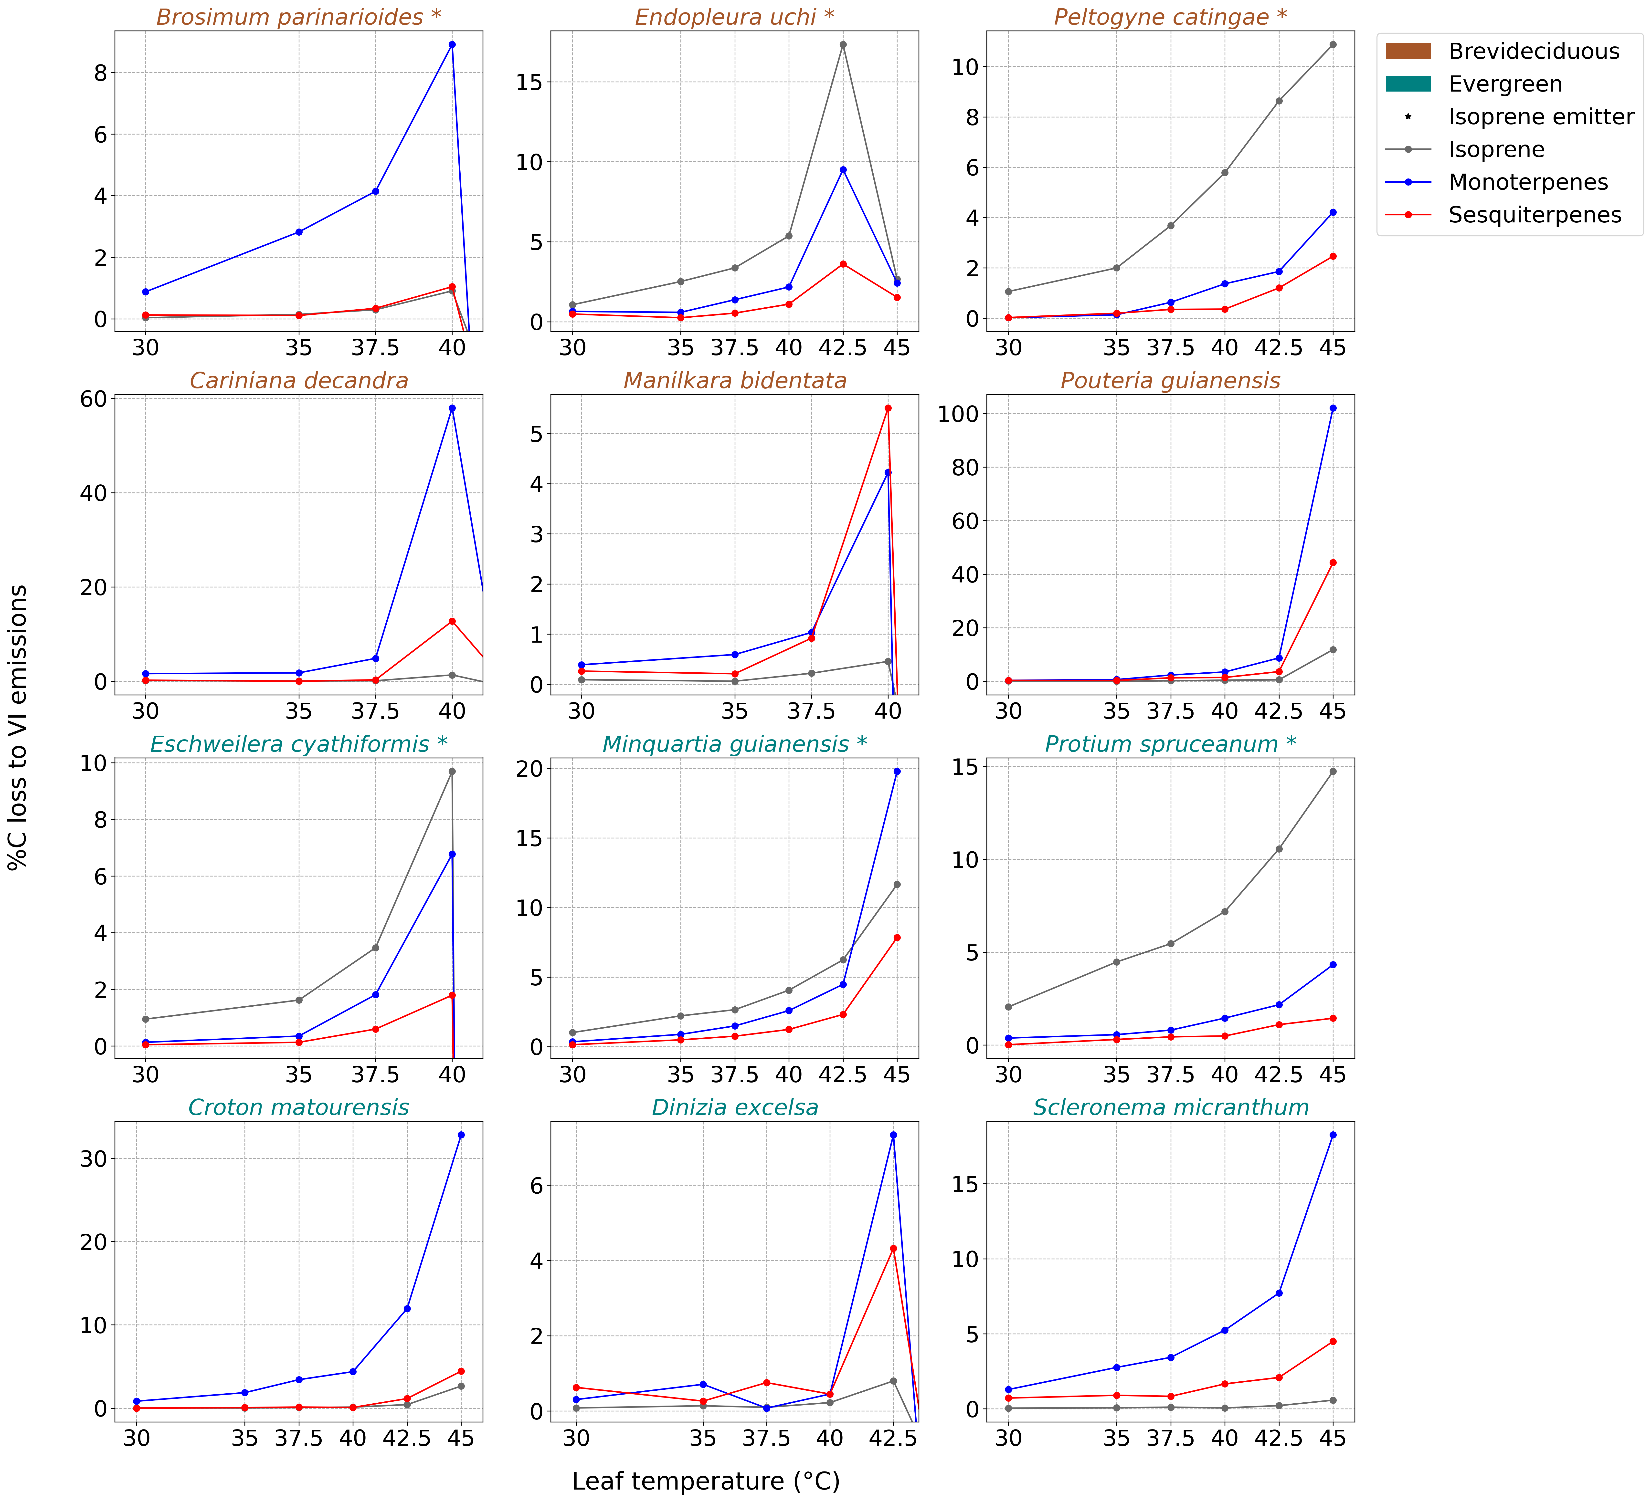


**Figure S8.** Changes in the percentages of photosynthetic carbon (%C) loss to volatile isoprenoid (VI) emissions with increasing leaf temperature (°C) for each species measured. The font color of the species names corresponds to their leaf phenological types (Brevideciduous - brown; Evergreen - green). The symbol “*” indicates that the species was classified as an isoprene emitter in Robin et al. (2024). Isoprene is shown in gray, monoterpenes in blue, and sesquiterpenes in red.


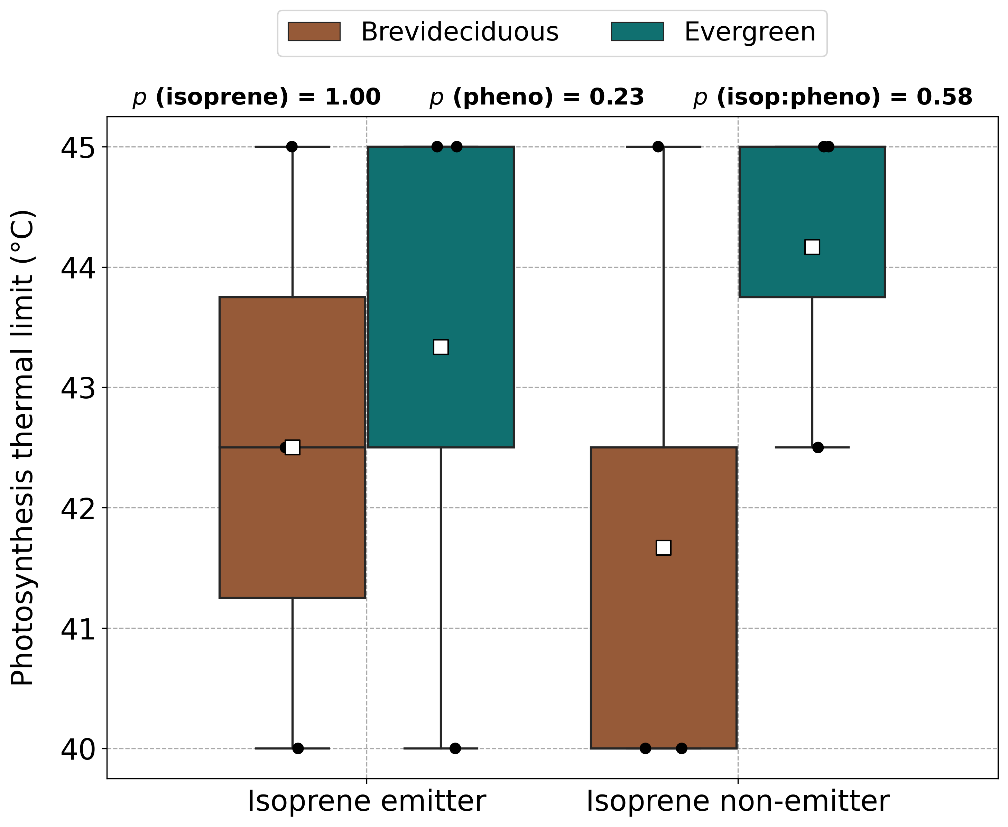


**Figure S9.** Comparisons of the highest observed leaf temperature where net photosynthesis rates were still positive (photosynthesis thermal limit, °C) between brevideciduous (brown) and evergreen (green) isoprene emitters and non-emitters (*n* = 12). Boxplots show the median and 25th and 75th percentiles, whiskers show the maximum and minimum acquired data points that were not considered outliers, black circles represent the observed data points, and average values are indicated by the white squares. The *p* values were extracted from general linear regression models of photosynthesis thermal limit varying as a function of isoprene emissions (Emitter, Non-emitter; *y* ~ isoprene; *p* (isoprene)), of leaf phenological types (Brevideciduous, Evergreen; *y* ~ pheno.type; *p* (pheno.type)), and of the interaction between isoprene emissions and leaf phenological types (*y* ~ isoprene * pheno.type; *p* (isop:pheno)).


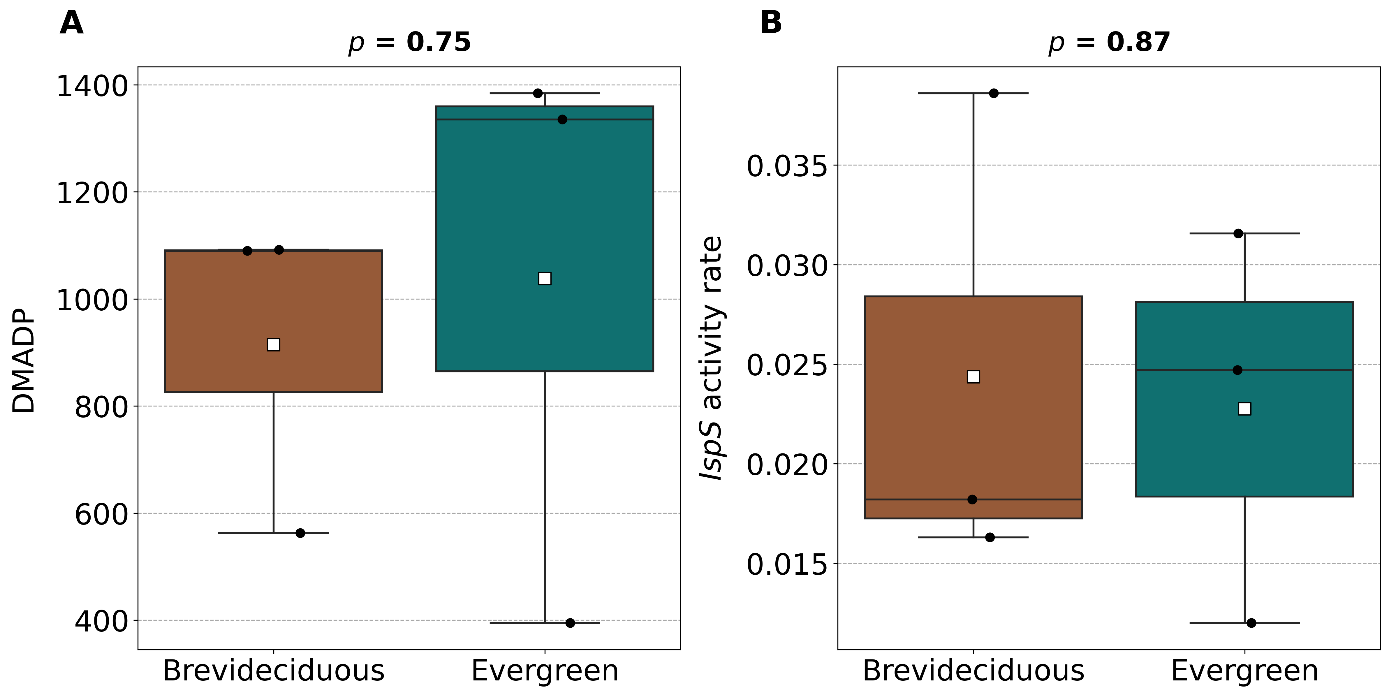


**Figure S10.** Comparisons of (A) dimethylallyl diphosphate (DMADP) pool sizes, and (B) isoprene synthase (*IspS*) activity rates between brevideciduous (brown) and evergreen (green) isoprene emitters (*n* = 6). Boxplots show the median and 25th and 75th percentiles, whiskers show the maximum and minimum acquired data points that were not considered outliers, black circles represent the observed data points, and average values are indicated by the white squares. The *p* values were extracted from general linear regression models of each *y* varying as a function of leaf phenological types (Brevideciduous, Evergreen; *y* ~ pheno.type).


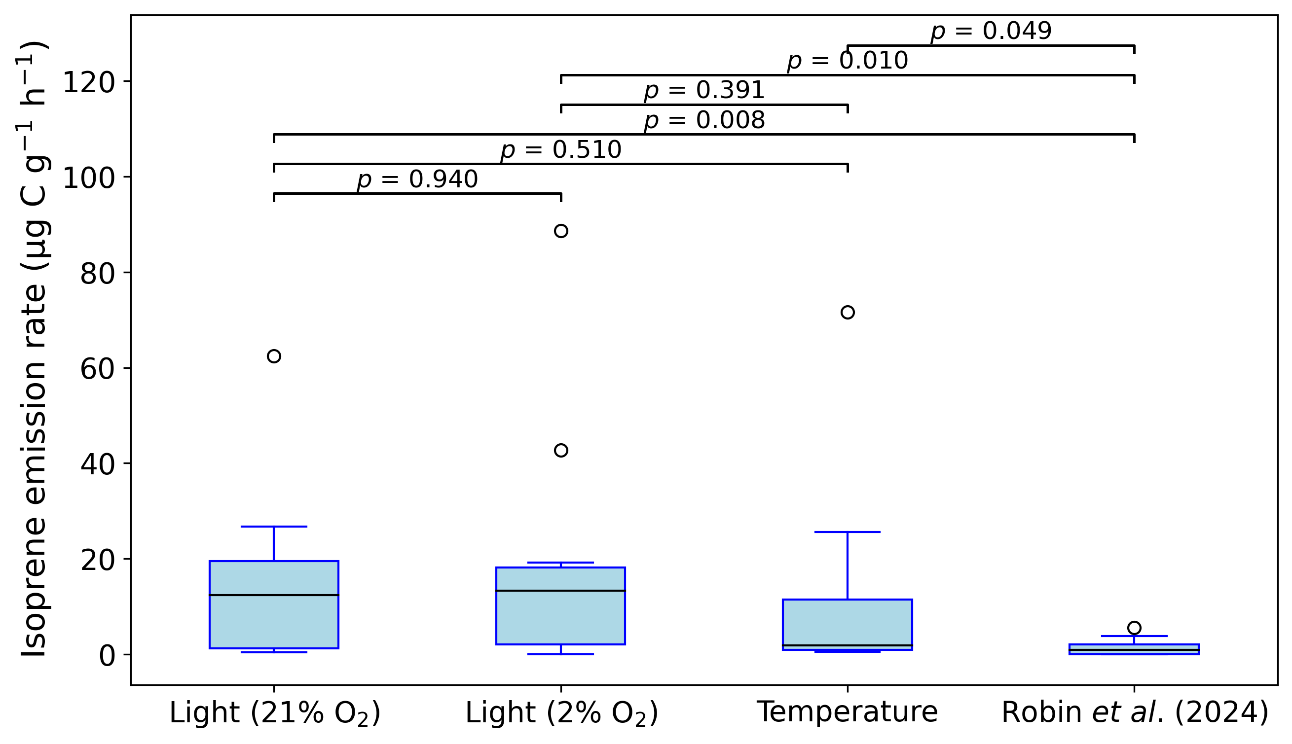


**Figure S11.** Kruskal-Wallis pairwisecomparisons of isoprene emission factors (*ε*0, µg C g-1 h-1) obtained from light response curves at ambient (Light 21% O2) and reduced (Light 2% O2) oxygen concentrations and temperature response curves performed in this study and from Robin et al. (2024).


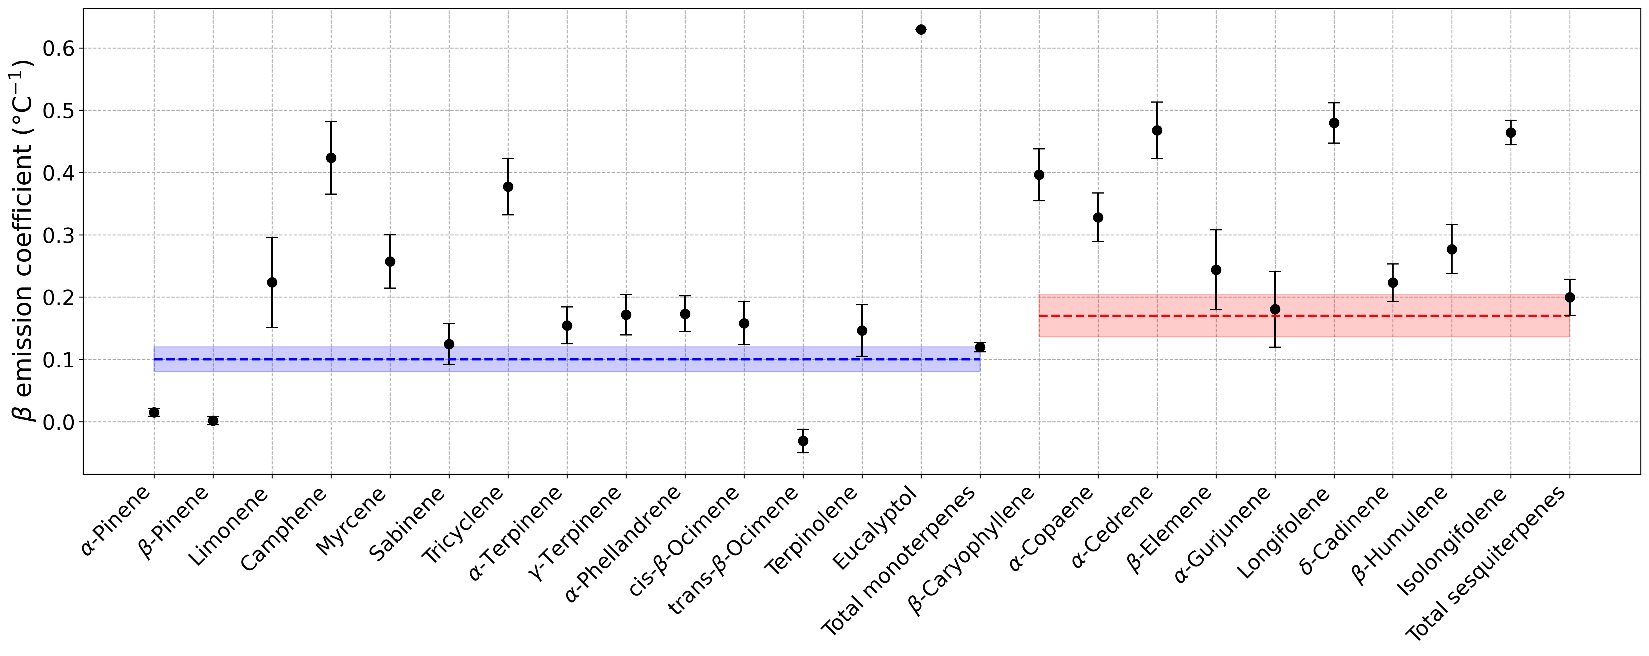


**Figure S12.** Empirically derived β coefficient of monoterpene and sesquiterpene emission responses to temperature, for each individual compound and total emitted monoterpenes and sesquiterpenes measured in this study. Dashed horizontal lines indicate expected β values for unstressed plants: 0.1 °C−1 for monoterpenes, in blue; and 0.17 °C−1 for sesquiterpenes, in red; as adopted in MEGAN v2.1 (Guenther *et al.*, 2012). The shaded area represents the ±20% range around each suggested value.

# Supplementary Tables

**Table S1.** Composition of multi-component calibration mixture of certified isoprene, monoterpene, and sesquiterpene gas standards in synthetic air (Apel-Riemer Environmental, Inc.). Uncertainty is a conservative estimate of the combination of gravimetric preparation and analysis uncertainties.

| **Compound** | **CAS#** | **Concentration (ppb)** | **Uncertainty** |
| --- | --- | --- | --- |
| Isoprene | 78-79-5 | 468 | 5% |
| α-Pinene | 80-56-8 | 488 | 5% |
| Camphene | 79-92-5 | 504 | 5% |
| β-Pinene | 18172-67-3 | 512 | 5% |
| α-Phellandrene | 4221-98-1 | 432 | 5% |
| 3-Carene | 13466-78-9 | 458 | 5% |
| Limonene | 5889-54-8 | 489 | 5% |
| *o*-Cymene | 527-84-4 | 481 | 5% |
| γ-Terpinene | 99-85-4 | 476 | 5% |
| β-Caryophyllene | 87-44-5 | 98.3 | 5% |
| α-Humulene | 6753-98-6 | 95.2 | 5% |

**Table S2.** Average values of air temperature (air temp, °C) and photosynthetic photon flux density (PPFD, µmol m-2 s-1) recorded at different hours of the day (Time) at 36 m above the canopy during October, November, and December/2022. Data was obtained from the weather station located at the micrometeorological tower in the upland forest plot.

| **Month** | **Time** | **Air temp (°C)** | **PPFD (µmol m-2 s-1)** |
| --- | --- | --- | --- |
| October | 9:00 | 27.7 | 1212 |
|  | 13:00 | 30.0 | 702 |
|  | 17:00 | 29.0 | 88 |
| November | 9:00 | 27.2 | 1193 |
|  | 13:00 | 30.0 | 746 |
|  | 17:00 | 28.3 | 98 |
| December | 9:00 | 26.4 | 1049 |
|  | 13:00 | 28.4 | 1018 |
|  | 17:00 | 26.8 | 133 |

# Supplementary references

Guenther A, Baugh B, Brasseur G, Greenberg J, Harley P, Klinger L, Serça D, Vierling L. 1999. Isoprene emission estimates and uncertainties for the central African EXPRESSO study domain. *Journal of Geophysical Research: Atmospheres* 104: 30625–30639.

Guenther A, Jiang X, Heald CL, Sakulyanontvittaya T, Duhl T, Emmons LK, Wang X. 2012. The Model of Emissions of Gases and Aerosols from Nature version 2.1 (MEGAN2.1): an extended and updated framework for modeling biogenic emissions. *Geoscientific Model Development* 5: 1471–1492.

Robin M, Römermann C, Niinemets Ü, Gershenzon J, Huang J, Nelson BW, Taylor TC, de Souza VF, Pinho D, Falcão L, *et al.* 2024. Interactions between leaf phenological type and functional traits drive variation in isoprene emissions in central Amazon forest trees. *Frontiers in Plant Science* 15: 1522606.
